# Supplementary material for: Improved transparency–nonlinearity trade-off with boroxine-based octupolar molecules
Source: Royal Society of Chemistry journal article supplement (doi:10.1039/b308664j), 2003-01-01
Supplement: b308664j.pdf [file b308664j.pdf]

## Improved transparency-nonlinearity trade-off with boroxine-based octupolar molecules

Gilles Alcaraz,<sup>a</sup> Lisenn Euzenat,<sup>a</sup> Olivier Mongin,<sup>a</sup> Claudine Katan,<sup>a</sup>  
Isabelle Ledoux,<sup>b</sup> Joseph Zyss,<sup>b</sup> Mireille Blanchard-Desce<sup>\*a</sup> and Michel Vaultier<sup>\*a</sup>

<sup>a</sup> *Synthèse et ElectroSynthèse Organiques (CNRS, UMR 6510), Université de Rennes 1, Institut de Chimie, Campus Scientifique de Beaulieu, Bât 10A, F-35042 Rennes Cedex, France. E-mail : Mireille.Blanchard-Desce@univ-rennes1.fr*

<sup>b</sup> *Laboratoire de Photonique Quantique et Moléculaire (CNRS UMR 8537), ENS Cachan, 61 avenue du Président Wilson, F-94235 Cachan Cedex, France*

High Resolution Mass Spectra were performed by the *Centre Régional de Mesures Physiques de l'Ouest* (Rennes).

Crystal structure of compound **1** was performed by the *Centre de Diffractométrie X* at University of Rennes 1.

### Characterization data for compounds 1-3:

**1:** <sup>1</sup>H (200 MHz, CDCl<sub>3</sub>): δ 3.80 (s, 9H, OCH<sub>3</sub>), 7.95 and 8.10 (d, <sup>3</sup>J<sub>HH</sub>=8.54 Hz, CH). <sup>13</sup>C (50 MHz, CDCl<sub>3</sub>): δ 55.6 (s, 3C, OCH<sub>3</sub>), 113.9 and 137.9 (s, 6C, CH), 163.6 (s, 3C, C<sup>IV</sup>-OMe). <sup>11</sup>B NMR (96.3 MHz, CDCl<sub>3</sub>): δ 29.3. HRMS [M<sup>+</sup>] calcd. for C<sub>21</sub>H<sub>21</sub>O<sub>6</sub>B<sub>3</sub>: *m/z* 402.1617. Found 402.1649 (7 ppm). C<sub>21</sub>H<sub>21</sub>O<sub>6</sub>B<sub>3</sub>: C 62.77, H 5.27; found C 62.76, H 5.31.

**2:** <sup>1</sup>H (200 MHz, CDCl<sub>3</sub>): δ 2.47 (s, 9H, SCH<sub>3</sub>), 7.38 and 8.14 (d, <sup>3</sup>J<sub>HH</sub>=8.33 Hz, CH). <sup>13</sup>C (50 MHz, CDCl<sub>3</sub>): δ 15.3 (s, SCH<sub>3</sub>), 125.3 and 136.3 (s, 6C, CH), 145.0 (s, 3C, C<sup>IV</sup>-SMe). <sup>11</sup>B NMR (96.3 MHz, CDCl<sub>3</sub>): δ 33.2. HRMS [M<sup>+</sup>] calcd. for C<sub>21</sub>H<sub>21</sub>O<sub>3</sub>S<sub>3</sub>B<sub>3</sub>: *m/z* 450.0932. Found 450.0938 (1 ppm). C<sub>21</sub>H<sub>21</sub>O<sub>3</sub>S<sub>3</sub>B<sub>3</sub>: C 56.05, H 4.70; found C 55.57, H 4.91

**3:** <sup>1</sup>H (200 MHz, CDCl<sub>3</sub>): δ 3.10 (s, 18H, NMe<sub>2</sub>), 6.83 and 8.14 (d, <sup>3</sup>J<sub>HH</sub>=8.85 Hz, CH). <sup>13</sup>C (50 MHz, CDCl<sub>3</sub>): δ 40.5 (s, 6C, NMe<sub>2</sub>), 111.5 and 137.5 (s, 6C, CH), 153.6 (s, 3C, C<sup>IV</sup>-NMe<sub>2</sub>). <sup>11</sup>B NMR (96.3 MHz, CDCl<sub>3</sub>): δ 29.8. HRMS [M<sup>+</sup>] calcd. for C<sub>24</sub>H<sub>30</sub>N<sub>3</sub>O<sub>3</sub>B<sub>3</sub>: *m/z* 441.2566. Found 441.2564 (0 ppm). C<sub>24</sub>H<sub>30</sub>N<sub>3</sub>O<sub>3</sub>B<sub>3</sub>: C 65.37, H 6.86, N 9.53; found C 64.67, H 6.84, N 9.25.

### UV-Visible spectra for compounds 1-3:

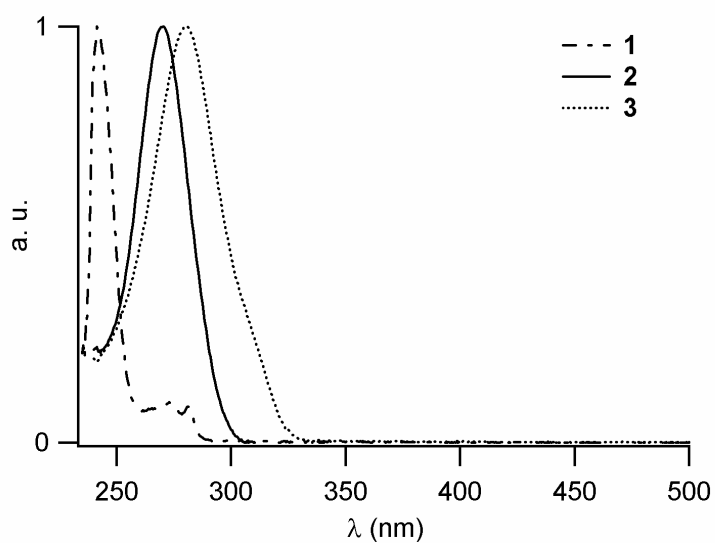

Normalized absorption spectra of molecules 1-3 in chloroform.

## Computational details.

Calculations were conducted using the Gaussian 98 package<sup>1</sup> with the B3LYP<sup>2</sup> density functional and the 6-31G\* basis set.  $C_{3h}$  symmetry has been assumed for compounds **1-2** and  $D_{3h}$  for compound **3**.

## References:

- 1 Gaussian 98, Revision A.11, M. J. Frisch, G. W. Trucks, H. B. Schlegel, G. E. Scuseria, M. A. Robb, J. R. Cheeseman, V. G. Zakrzewski, J. A. Montgomery Jr., R. E. Stratmann, J. C. Burant, S. Dapprich, J. M. Millam, A. D. Daniels, K. N. Kudin, M. C. Strain, O. Farkas, J. Tomasi, V. Barone, M. Cossi, R. Cammi, B. Mennucci, C. Pomelli, C. Adamo, S. Clifford, J. Ochterski, G. A. Petersson, P. Y. Ayala, Q. Cui, K. Morokuma, D. K. Malick, A. D. Rabuck, K. Raghavachari, J. B. Foresman, J. Cioslowski, J. V. Ortiz, B. B. Stefanov, G. Liu, A. Liashenko, P. Piskorz, I. Komaromi, R. Gomperts, R. L. Martin, D. J. Fox, T. Keith, M. A. Al-Laham, C. Y. Peng, A. Nanayakkara, C. Gonzalez, M. Challacombe, P. M. W. Gill, B. Johnson, W. Chen, M. W. Wong, J. L. Andres, M. Head-Gordon, R. E. S. and J. A. Pople, Gaussian, Inc., Pittsburgh PA, 2001.
- 2 A. D. Becke, *J. Chem. Phys.*, 1993, **98**, 5648.
